# Supplementary material for: Children with Intestinal Failure Maintain Their Renal Function on Long-Term Parenteral Nutrition
Source: MDPI journal article supplement (doi:10.3390/nu13103647), 2021-10-18
Supplement: s1 [file s1]

**Supplementary Table S1.** Parenteral nutrition (PN) regimen.

| Patient no. | PN bag volume (ml) | Days on PN per week | duration of PN infusion (hours) | Weekly PN volume (ml) | PN volume/Kg/day (ml) | PN volume/Kg/week (ml) | Daily PN composition: |                      |                 |
|-------------|--------------------|---------------------|---------------------------------|-----------------------|-----------------------|------------------------|-----------------------|----------------------|-----------------|
|             |                    |                     |                                 |                       |                       |                        | Energy/Kg (Kcl)       | Amino-acids/Kg (Kcl) | Sodium/Kg (mEq) |
| 1           | 800                | 3                   | 10                              | 2400                  | 50                    | 150.0                  | 28                    | 1.0                  | 2.2             |
| 2           | 2000               | 7                   | 12                              | 14000                 | 111                   | 777.8                  | 62.2                  | 2.0                  | 12.2            |
| 3           | 900                | 7                   | 10                              | 6300                  | 86                    | 600.0                  | 56.5                  | 2.2                  | 5.7             |
| 4           | 1000               | 3                   | 12                              | 3000                  | 53                    | 157.9                  | 41.2                  | 1.4                  | 5.3             |
| 5           | 900                | 6                   | 9                               | 5400                  | 53                    | 317.6                  | 39.1                  | 1.4                  | 2.4             |
| 6           | 2700               | 7                   | 14                              | 18900                 | 77                    | 540.0                  | 44.2                  | 1.4                  | 6.4             |
| 7           | 900                | 7                   | 11                              | 6300                  | 82                    | 572.7                  | 59                    | 2.0                  | 4.1             |
| 8           | 1200               | 7                   | 11                              | 8400                  | 63                    | 442.1                  | 50                    | 1.8                  | 2.4             |
| 9           | 2500               | 7                   | 9                               | 17500                 | 55                    | 388.9                  | 35                    | 1.3                  | 2.8             |
| 10          | 1200               | 7                   | 10                              | 8400                  | 55                    | 381.8                  | 48.6                  | 1.8                  | 4.5             |
| 11          | 1500               | 7                   | 12                              | 10500                 | 68                    | 477.3                  | 60                    | 2.2                  | 5.5             |
| 12          | 1200               | 6                   | 9                               | 7200                  | 48                    | 288.0                  | 33                    | 1.2                  | 4.0             |
| 13          | 1200               | 7                   | 12                              | 8400                  | 109                   | 763.6                  | 65                    | 2.2                  | 9.1             |
| 14          | 1300               | 7                   | 16                              | 9100                  | 100                   | 700.0                  | 67                    | 2.2                  | 10.0            |
| 15          | 1600               | 7                   | 12                              | 11200                 | 76                    | 533.3                  | 52                    | 2.1                  | 9.5             |
